# Supplementary material
Source: PubMed Central journal article supplement (PMC4787711)
Supplement: harc725382.ww1_default.pdf [file harc725382.ww1_default.pdf]

## Webextra: Supplementary tables

BMJ 2010;340:c1240 [Posted as supplied by author]

**Table 1. Liver disease mortality by BMI category in men from the Main and Collaborative studies, excluding underweight**

|                                              | BMI category  |                        |                        | p       | RR per SD increase in BMI* |
|----------------------------------------------|---------------|------------------------|------------------------|---------|----------------------------|
|                                              | Normal weight | Overweight             | Obese                  |         |                            |
| Number of men                                | 4960          | 4000                   | 526                    |         |                            |
| <b>Liver disease as main cause of death†</b> |               |                        |                        |         |                            |
| Number of deaths                             | 28            | 39                     | 12                     |         |                            |
| RR <sub>1</sub>                              | 1             | 1.84<br>(1.13 to 3.0)  | 5.25<br>(2.65 to 10.4) | <0.0001 | 1.51<br>(1.23 to 1.85)     |
| RR <sub>2</sub>                              | 1             | 1.83<br>(1.12 to 3.0)  | 4.78<br>(2.37 to 9.66) | <0.0001 | 1.47<br>(1.20 to 1.81)     |
| <b>Liver disease in any position‡</b>        |               |                        |                        |         |                            |
| Number of deaths                             | 53            | 74                     | 18                     |         |                            |
| RR <sub>1</sub>                              | 1             | 1.77<br>(1.24 to 2.53) | 4.02<br>(2.34 to 6.88) | <0.0001 | 1.47<br>(1.27 to 1.71)     |
| RR <sub>2</sub>                              | 1             | 1.75<br>(1.22 to 2.50) | 3.47<br>(1.99 to 6.05) | <0.0001 | 1.42<br>(1.22 to 1.65)     |

RR<sub>1</sub> adjusted for age and study

RR<sub>2</sub> adjusted for age, study, social class, smoking, systolic blood pressure, height, bronchitis, FEV1, angina, ischaemia on ECG and diabetes

\* 1 SD BMI=3.01kg/m<sup>2</sup>

† p for interaction between studies=0.07

‡ p for interaction between studies=0.28

**Table 2. Liver disease mortality by alcohol consumption in men from the Main & Collaborative studies, excluding underweight**

|                                              | Units of alcohol/week |                        |                        |                        |                        |                        | p       | RR per unit increase*  |
|----------------------------------------------|-----------------------|------------------------|------------------------|------------------------|------------------------|------------------------|---------|------------------------|
|                                              | 0                     | 1 - 7                  | 8 - 14                 | 15 - 21                | 22 - 34                | 35+                    |         |                        |
| Number of men                                | 3328                  | 1805                   | 1754                   | 1010                   | 934                    | 655                    |         |                        |
| <b>Liver disease as main cause of death†</b> |                       |                        |                        |                        |                        |                        |         |                        |
| Number of deaths                             | 9                     | 9                      | 7                      | 16                     | 19                     | 19                     |         |                        |
| RR <sub>1</sub>                              | 1                     | 1.79<br>(0.71 to 4.52) | 1.48<br>(0.55 to 3.98) | 6.20<br>(2.73 to 14.1) | 8.13<br>(3.66 to 18.0) | 12.8<br>(5.75 to 28.6) | <0.0001 | 1.03<br>(1.02 to 1.03) |
| RR <sub>2</sub>                              | 1                     | 1.65<br>(0.65 to 4.18) | 1.36<br>(0.51 to 3.68) | 5.68<br>(2.48 to 13.0) | 7.45<br>(3.31 to 16.8) | 11.6<br>(5.11 to 26.5) | <0.0001 | 1.03<br>(1.02 to 1.03) |
| <b>Liver disease in any position‡</b>        |                       |                        |                        |                        |                        |                        |         |                        |
| Number of deaths                             | 18                    | 18                     | 22                     | 23                     | 33                     | 31                     |         |                        |
| RR <sub>1</sub>                              | 1                     | 1.75<br>(0.91 to 3.37) | 2.28<br>(1.22 to 4.26) | 4.43<br>(2.39 to 8.23) | 6.90<br>(3.87 to 12.3) | 10.1<br>(5.63 to 18.2) | <0.0001 | 1.02<br>(1.02 to 1.03) |
| RR <sub>2</sub>                              | 1                     | 1.67<br>(0.86 to 3.22) | 2.14<br>(1.14 to 4.0)  | 3.93<br>(2.10 to 7.35) | 6.17<br>(3.43 to 11.1) | 8.83<br>(4.83 to 16.1) | <0.0001 | 1.02<br>(1.01 to 1.03) |

RR<sub>1</sub> adjusted for age and study

RR<sub>2</sub> adjusted for age, study, social class, smoking, height, bronchitis, FEV1, angina, ischaemia on ECG and diabetes

\* excluding non-drinkers

† p for interaction between studies=0.80

‡ p for interaction between studies=0.78

**Table 3. Liver disease mortality by BMI and alcohol consumption in men from the Main and Collaborative studies, excluding underweight**

| BMI category         | Drinking status<br>(units/week) |                        |                        |
|----------------------|---------------------------------|------------------------|------------------------|
|                      | 0                               | 1 - 14                 | 15+                    |
| <b>Normal weight</b> |                                 |                        |                        |
| Number of men        | 1722                            | 1926                   | 1312                   |
| Number of deaths     | 6                               | 6                      | 16                     |
| RR <sub>1</sub>      | 1                               | 0.90<br>(0.29 to 2.79) | 3.98<br>(1.55 to 10.2) |
| RR <sub>2</sub>      | 1                               | 0.83<br>(0.27 to 2.59) | 3.64<br>(1.41 to 9.45) |
| <b>Overweight</b>    |                                 |                        |                        |
| Number of men        | 1414                            | 1465                   | 1121                   |
| Number of deaths     | 3                               | 7                      | 29                     |
| RR <sub>1</sub>      | 0.67<br>(0.17 to 2.68)          | 1.45<br>(0.49 to 4.34) | 8.50<br>(3.51 to 20.6) |
| RR <sub>2</sub>      | 0.69<br>(0.17 to 2.78)          | 1.39<br>(0.47 to 4.17) | 8.03<br>(3.28 to 19.7) |
| <b>Obese</b>         |                                 |                        |                        |
| Number of men        | 192                             | 168                    | 166                    |
| Number of deaths     | 0                               | 3                      | 9                      |
| RR <sub>1</sub>      | -                               | 6.32<br>(1.58 to 25.3) | 21.7<br>(7.67 to 61.5) |
| RR <sub>2</sub>      | -                               | 6.06<br>(1.50 to 24.5) | 22.0<br>(7.60 to 63.5) |

RR<sub>1</sub> adjusted for age and study

RR<sub>2</sub> adjusted for age, study, social class, smoking, height, bronchitis, FEV1, angina, ischaemia on ECG and diabetes

**Table 4. Liver disease mentioned as any cause of death by BMI and alcohol consumption in men from the Main and Collaborative studies, excluding underweight**

| BMI category     | Drinking status<br>(units/week) |                        |                        |
|------------------|---------------------------------|------------------------|------------------------|
|                  | 0                               | 1 - 14                 | 15+                    |
| Normal weight    |                                 |                        |                        |
| Number of deaths | 10                              | 15                     | 28                     |
| RR <sub>1</sub>  | 1                               | 1.32<br>(0.59 to 2.95) | 4.15<br>(2.01 to 8.56) |
| RR <sub>2</sub>  | 1                               | 1.25<br>(0.56 to 2.79) | 3.62<br>(1.74 to 7.52) |
| Overweight       |                                 |                        |                        |
| Number of deaths | 8                               | 20                     | 46                     |
| RR <sub>1</sub>  | 1.04<br>(0.41 to 2.62)          | 2.36<br>(1.10 to 5.05) | 7.63<br>(3.84 to 15.2) |
| RR <sub>2</sub>  | 1.05<br>(0.41 to 2.66)          | 2.26<br>(1.05 to 4.85) | 6.90<br>(3.44 to 13.8) |
| Obese            |                                 |                        |                        |
| Number of deaths | 0                               | 5                      | 13                     |
| RR <sub>1</sub>  | -                               | 6.07<br>(2.07 to 17.8) | 17.7<br>(7.70 to 40.5) |
| RR <sub>2</sub>  | -                               | 5.39<br>(1.83 to 15.9) | 15.6<br>(6.68 to 36.3) |

RR<sub>1</sub> adjusted for age and study

RR<sub>2</sub> adjusted for age, study, social class, smoking, height, bronchitis, FEV1, angina, ischaemia on ECG and diabetes

**Table 5. Liver disease ascertained by any position on the death certification, any position on SMR1 or cancer registration by BMI and alcohol for men in the Collaborative study only, excluding underweight**

| BMI category              | Drinking status<br>(units/week) |                        |                        |
|---------------------------|---------------------------------|------------------------|------------------------|
|                           | 0                               | 1 - 14                 | 15+                    |
| <b>Normal weight</b>      |                                 |                        |                        |
| Number of men             | 911                             | 1175                   | 834                    |
| Number with liver disease | 11                              | 25                     | 34                     |
| RR <sub>1</sub>           | 1                               | 1.82<br>(0.90 to 3.71) | 4.16<br>(2.11 to 8.22) |
| RR <sub>2</sub>           | 1                               | 1.76<br>(0.87 to 3.59) | 3.73<br>(1.88 to 7.43) |
| <b>Overweight</b>         |                                 |                        |                        |
| Number of men             | 845                             | 996                    | 849                    |
| Number with liver disease | 13                              | 24                     | 67                     |
| RR <sub>1</sub>           | 1.34<br>(0.60 to 3.0)           | 2.05<br>(1.0 to 4.18)  | 7.90<br>(4.17 to 15.0) |
| RR <sub>2</sub>           | 1.37<br>(0.61 to 3.05)          | 2.0<br>(0.98 to 4.09)  | 7.41<br>(3.89 to 14.1) |
| <b>Obese</b>              |                                 |                        |                        |
| Number of men             | 120                             | 107                    | 132                    |
| Number with liver disease | 0                               | 6                      | 13                     |
| RR <sub>1</sub>           | -                               | 5.34<br>(1.97 to 14.4) | 11.4<br>(5.09 to 25.4) |
| RR <sub>2</sub>           | -                               | 4.84<br>(1.78 to 13.2) | 10.6<br>(4.70 to 24.0) |

RR<sub>1</sub> adjusted for age

RR<sub>2</sub> adjusted for age, social class, smoking, height, bronchitis, FEV1, angina, ischaemia on ECG and diabetes

**Table 6. Liver disease mortality by BMI category in men from the Main and Collaborative studies, excluding deaths in the 1<sup>st</sup> 5 years**

|                                             | BMI category        |                        |                        | p       | RR per SD increase in BMI* |
|---------------------------------------------|---------------------|------------------------|------------------------|---------|----------------------------|
|                                             | Under/Normal weight | Overweight             | Obese                  |         |                            |
| Number of men                               | 4781                | 3776                   | 472                    |         |                            |
| <b>Liver disease as main cause of death</b> |                     |                        |                        |         |                            |
| Number of deaths                            | 27                  | 36                     | 12                     |         |                            |
| RR <sub>1</sub>                             | 1                   | 1.80<br>(1.09 to 2.98) | 5.64<br>(2.84 to 11.2) | <0.0001 | 1.55<br>(1.26 to 1.91)     |
| RR <sub>2</sub>                             | 1                   | 1.79<br>(1.08 to 2.97) | 5.0<br>(2.46 to 10.2)  | <0.0001 | 1.50<br>(1.22 to 1.86)     |
| <b>Liver disease in any position</b>        |                     |                        |                        |         |                            |
| Number of deaths                            | 51                  | 71                     | 18                     |         |                            |
| RR <sub>1</sub>                             | 1                   | 1.80<br>(1.25 to 2.58) | 4.29<br>(2.50 to 7.37) | <0.0001 | 1.52<br>(1.30 to 1.77)     |
| RR <sub>2</sub>                             | 1                   | 1.76<br>(1.22 to 2.54) | 3.62<br>(2.07 to 6.33) | <0.0001 | 1.45<br>(1.24 to 1.70)     |

RR<sub>1</sub> adjusted for age and study

RR<sub>2</sub> adjusted for age, study, social class, smoking, systolic blood pressure, height, bronchitis, FEV1, angina, ischaemia on ECG and diabetes

\* 1 SD BMI=3.07kg/m<sup>2</sup>

**Table 7. Liver disease mortality by alcohol consumption in men from the Main & Collaborative studies, excluding deaths in the 1<sup>st</sup> 5 years**

|                                             | Units of alcohol/week |                        |                        |                        |                        |                        | p       | RR per unit increase*  |
|---------------------------------------------|-----------------------|------------------------|------------------------|------------------------|------------------------|------------------------|---------|------------------------|
|                                             | 0                     | 1 - 7                  | 8 - 14                 | 15 - 21                | 22 - 34                | 35+                    |         |                        |
| Number of men                               | 3183                  | 1738                   | 1695                   | 975                    | 894                    | 619                    |         |                        |
| <b>Liver disease as main cause of death</b> |                       |                        |                        |                        |                        |                        |         |                        |
| Number of deaths                            | 9                     | 9                      | 6                      | 16                     | 18                     | 17                     |         |                        |
| RR <sub>1</sub>                             | 1                     | 1.79<br>(0.71 to 4.53) | 1.27<br>(0.45 to 3.58) | 6.24<br>(2.75 to 14.2) | 7.79<br>(3.48 to 17.4) | 11.7<br>(5.16 to 26.4) | <0.0001 | 1.03<br>(1.02 to 1.03) |
| RR <sub>2</sub>                             | 1                     | 1.67<br>(0.66 to 4.23) | 1.16<br>(0.41 to 3.27) | 5.54<br>(2.42 to 12.7) | 6.84<br>(3.01 to 15.5) | 10.1<br>(4.37 to 23.3) | <0.0001 | 1.02<br>(1.01 to 1.03) |
| <b>Liver disease in any position</b>        |                       |                        |                        |                        |                        |                        |         |                        |
| Number of deaths                            | 18                    | 18                     | 21                     | 23                     | 32                     | 28                     |         |                        |
| RR <sub>1</sub>                             | 1                     | 1.75<br>(0.91 to 3.37) | 2.18<br>(1.16 to 4.10) | 4.45<br>(2.40 to 8.27) | 6.74<br>(3.77 to 12.0) | 9.22<br>(5.07 to 16.8) | <0.0001 | 1.02<br>(1.02 to 1.03) |
| RR <sub>2</sub>                             | 1                     | 1.69<br>(0.87 to 3.26) | 2.05<br>(1.08 to 3.85) | 3.91<br>(2.09 to 7.30) | 5.91<br>(3.27 to 10.7) | 7.91<br>(4.28 to 14.6) | <0.0001 | 1.02<br>(1.01 to 1.03) |

RR<sub>1</sub> adjusted for age and study

RR<sub>2</sub> adjusted for age, study, social class, smoking, height, bronchitis, FEV1, angina, ischaemia on ECG and diabetes

\* excluding non-drinkers

**Table 8. Liver disease mortality by BMI and alcohol consumption in men from the Main and Collaborative studies, excluding deaths in the 1<sup>st</sup> 5 years**

| BMI category               | Drinking status<br>(units/week) |                     |                     |
|----------------------------|---------------------------------|---------------------|---------------------|
|                            | 0                               | 1 - 14              | 15+                 |
| <b>Under/Normal weight</b> |                                 |                     |                     |
| Number of men              | 1659                            | 1879                | 1270                |
| Number of deaths           | 6                               | 5                   | 16                  |
| RR <sub>1</sub>            | 1                               | 0.75 (0.23 to 2.47) | 4.04 (1.57 to 10.3) |
| RR <sub>2</sub>            | 1                               | 0.70 (0.21 to 2.29) | 3.58 (1.38 to 9.28) |
| <b>Overweight</b>          |                                 |                     |                     |
| Number of men              | 1347                            | 1399                | 1066                |
| Number of deaths           | 3                               | 7                   | 26                  |
| RR <sub>1</sub>            | 0.69 (0.17 to 2.75)             | 1.49 (0.50 to 4.46) | 7.86 (3.21 to 19.2) |
| RR <sub>2</sub>            | 0.71 (0.18 to 2.86)             | 1.43 (0.48 to 4.28) | 7.19 (2.91 to 17.8) |
| <b>Obese</b>               |                                 |                     |                     |
| Number of men              | 177                             | 155                 | 152                 |
| Number of deaths           | 0                               | 3                   | 9                   |
| RR <sub>1</sub>            | -                               | 6.54 (1.63 to 26.2) | 22.7 (8.03 to 64.5) |
| RR <sub>2</sub>            | -                               | 6.16 (1.52 to 24.9) | 22.1 (7.63 to 64.1) |

RR<sub>1</sub> adjusted for age and study

RR<sub>2</sub> adjusted for age, study, social class, smoking, height, bronchitis, FEV1, angina, ischaemia on ECG and diabetes



**Table 9. Liver disease mentioned as any cause of death by BMI and alcohol consumption in men from the Main and Collaborative studies, excluding deaths in the 1<sup>st</sup> 5 years**

| BMI category        | Drinking status<br>(units/week) |                     |                     |
|---------------------|---------------------------------|---------------------|---------------------|
|                     | 0                               | 1 - 14              | 15+                 |
| Under/Normal weight |                                 |                     |                     |
| Number of deaths    | 10                              | 14                  | 27                  |
| RR <sub>1</sub>     | 1                               | 1.24 (0.55 to 2.80) | 4.04 (1.95 to 8.36) |
| RR <sub>2</sub>     | 1                               | 1.18 (0.52 to 2.66) | 3.49 (1.67 to 7.28) |
| Overweight          |                                 |                     |                     |
| Number of deaths    | 8                               | 20                  | 43                  |
| RR <sub>1</sub>     | 1.06 (0.42 to 2.68)             | 2.41 (1.12 to 5.15) | 7.30 (3.66 to 14.6) |
| RR <sub>2</sub>     | 1.07 (0.42 to 2.71)             | 2.31 (1.08 to 4.96) | 6.50 (3.23 to 13.1) |
| Obese               |                                 |                     |                     |
| Number of deaths    | 0                               | 5                   | 13                  |
| RR <sub>1</sub>     | -                               | 6.23 (2.13 to 18.3) | 18.3 (7.97 to 41.9) |
| RR <sub>2</sub>     | -                               | 5.51 (1.87 to 16.2) | 15.6 (6.70 to 36.5) |

RR<sub>1</sub> adjusted for age and study

RR<sub>2</sub> adjusted for age, study, social class, smoking, height, bronchitis, FEV1, angina, ischaemia on ECG and diabetes

**Table 10. Liver disease mortality by BMI category in men from the Main and Collaborative studies, excluding deaths in the 1<sup>st</sup> 10 years**

|                                             | BMI category        |                        |                        | p       | RR per SD increase in BMI* |
|---------------------------------------------|---------------------|------------------------|------------------------|---------|----------------------------|
|                                             | Under/Normal weight | Overweight             | Obese                  |         |                            |
| Number of men                               | 4476                | 3521                   | 442                    |         |                            |
| <b>Liver disease as main cause of death</b> |                     |                        |                        |         |                            |
| Number of deaths                            | 26                  | 31                     | 11                     |         |                            |
| RR <sub>1</sub>                             | 1                   | 1.64<br>(0.97 to 2.79) | 5.59<br>(2.74 to 11.4) | <0.0001 | 1.50<br>(1.20 to 1.88)     |
| RR <sub>2</sub>                             | 1                   | 1.64<br>(0.96 to 2.79) | 5.25<br>(2.51 to 11.0) | 0.001   | 1.49<br>(1.18 to 1.87)     |
| <b>Liver disease in any position</b>        |                     |                        |                        |         |                            |
| Number of deaths                            | 47                  | 63                     | 16                     |         |                            |
| RR <sub>1</sub>                             | 1                   | 1.76<br>(1.20 to 2.57) | 4.30<br>(2.43 to 7.61) | <0.0001 | 1.52<br>(1.29 to 1.79)     |
| RR <sub>2</sub>                             | 1                   | 1.72<br>(1.17 to 2.53) | 3.66<br>(2.03 to 6.61) | <0.0001 | 1.47<br>(1.24 to 1.73)     |

RR<sub>1</sub> adjusted for age and study

RR<sub>2</sub> adjusted for age, study, social class, smoking, systolic blood pressure, height, bronchitis, FEV1, angina, ischaemia on ECG and diabetes

\* 1 SD BMI=3.07kg/m<sup>2</sup>

**Table 11. Liver disease mortality by alcohol consumption in men from the Main & Collaborative studies, excluding deaths in the 1<sup>st</sup> 10 years**

|                                             | Units of alcohol/week |                        |                        |                        |                        |                        | p       | RR per unit increase*  |
|---------------------------------------------|-----------------------|------------------------|------------------------|------------------------|------------------------|------------------------|---------|------------------------|
|                                             | 0                     | 1 - 7                  | 8 - 14                 | 15 - 21                | 22 - 34                | 35+                    |         |                        |
| Number of men                               | 2951                  | 1621                   | 1572                   | 900                    | 828                    | 567                    |         |                        |
| <b>Liver disease as main cause of death</b> |                       |                        |                        |                        |                        |                        |         |                        |
| Number of deaths                            | 9                     | 9                      | 6                      | 13                     | 16                     | 15                     |         |                        |
| RR <sub>1</sub>                             | 1                     | 1.76<br>(0.70 to 4.44) | 1.25<br>(0.44 to 3.53) | 5.01<br>(2.13 to 11.7) | 6.84<br>(3.01 to 15.6) | 10.2<br>(4.44 to 23.6) | <0.0001 | 1.03<br>(1.02 to 1.03) |
| RR <sub>2</sub>                             | 1                     | 1.61<br>(0.63 to 4.07) | 1.12<br>(0.40 to 3.17) | 4.37<br>(1.84 to 10.3) | 5.83<br>(2.52 to 13.5) | 8.72<br>(3.70 to 20.6) | <0.0001 | 1.02<br>(1.01 to 1.03) |
| <b>Liver disease in any position</b>        |                       |                        |                        |                        |                        |                        |         |                        |
| Number of deaths                            | 17                    | 17                     | 20                     | 19                     | 29                     | 24                     |         |                        |
| RR <sub>1</sub>                             | 1                     | 1.74<br>(0.89 to 3.42) | 2.20<br>(1.15 to 4.20) | 3.90<br>(2.02 to 7.53) | 6.51<br>(3.56 to 11.9) | 8.53<br>(4.55 to 16.0) | <0.0001 | 1.02<br>(1.01 to 1.03) |
| RR <sub>2</sub>                             | 1                     | 1.67<br>(0.85 to 3.28) | 2.03<br>(1.06 to 3.90) | 3.35<br>(1.72 to 6.51) | 5.57<br>(3.01 to 10.3) | 7.20<br>(3.78 to 13.7) | <0.0001 | 1.02<br>(1.01 to 1.03) |

RR<sub>1</sub> adjusted for age and study

RR<sub>2</sub> adjusted for age, study, social class, smoking, height, bronchitis, FEV1, angina, ischaemia on ECG and diabetes

\* excluding non-drinkers

**Table 12. Liver disease mortality by BMI and alcohol consumption in men from the Main and Collaborative studies, excluding deaths in the 1<sup>st</sup> 10 years**

| BMI category               | Drinking status<br>(units/week) |                     |                     |
|----------------------------|---------------------------------|---------------------|---------------------|
|                            | 0                               | 1 - 14              | 15+                 |
| <b>Under/Normal weight</b> |                                 |                     |                     |
| Number of men              | 1561                            | 1750                | 1165                |
| Number of deaths           | 6                               | 5                   | 15                  |
| RR <sub>1</sub>            | 1                               | 0.74 (0.22 to 2.42) | 3.75 (1.45 to 9.69) |
| RR <sub>2</sub>            | 1                               | 0.67 (0.20 to 2.21) | 3.29 (1.25 to 8.61) |
| <b>Overweight</b>          |                                 |                     |                     |
| Number of men              | 1230                            | 1301                | 990                 |
| Number of deaths           | 3                               | 7                   | 21                  |
| RR <sub>1</sub>            | 0.70 (0.17 to 2.80)             | 1.50 (0.50 to 4.47) | 6.37 (2.56 to 15.9) |
| RR <sub>2</sub>            | 0.73 (0.18 to 2.91)             | 1.40 (0.47 to 4.21) | 5.67 (2.24 to 14.3) |
| <b>Obese</b>               |                                 |                     |                     |
| Number of men              | 160                             | 142                 | 140                 |
| Number of deaths           | 0                               | 3                   | 8                   |
| RR <sub>1</sub>            | -                               | 6.72 (1.68 to 26.9) | 20.6 (7.09 to 59.9) |
| RR <sub>2</sub>            | -                               | 6.19 (1.52 to 25.1) | 20.1 (6.72 to 59.8) |

RR<sub>1</sub> adjusted for age and study

RR<sub>2</sub> adjusted for age, study, social class, smoking, height, bronchitis, FEV1, angina, ischaemia on ECG and diabetes

**Table 13. Liver disease mentioned as any cause of death by BMI and alcohol consumption in men from the Main and Collaborative studies, excluding deaths in the 1<sup>st</sup> 10 years**

| BMI category        | Drinking status<br>(units/week) |                     |                     |
|---------------------|---------------------------------|---------------------|---------------------|
|                     | 0                               | 1 - 14              | 15+                 |
| Under/Normal weight |                                 |                     |                     |
| Number of deaths    | 9                               | 13                  | 25                  |
| RR <sub>1</sub>     | 1                               | 1.27 (0.54 to 2.99) | 4.19 (1.95 to 9.0)  |
| RR <sub>2</sub>     | 1                               | 1.20 (0.51 to 2.83) | 3.57 (1.65 to 7.73) |
| Overweight          |                                 |                     |                     |
| Number of deaths    | 8                               | 19                  | 36                  |
| RR <sub>1</sub>     | 1.19 (0.46 to 3.09)             | 2.57 (1.16 to 5.69) | 6.92 (3.32 to 14.4) |
| RR <sub>2</sub>     | 1.21 (0.47 to 3.14)             | 2.45 (1.10 to 5.43) | 6.02 (2.86 to 12.6) |
| Obese               |                                 |                     |                     |
| Number of deaths    | 0                               | 5                   | 11                  |
| RR <sub>1</sub>     | -                               | 7.12 (2.38 to 21.3) | 17.9 (7.37 to 43.4) |
| RR <sub>2</sub>     | -                               | 6.11 (2.03 to 18.4) | 15.1 (6.12 to 37.5) |

RR<sub>1</sub> adjusted for age and study

RR<sub>2</sub> adjusted for age, study, social class, smoking, height, bronchitis, FEV1, angina, ischaemia on ECG and diabetes

### **Comparison of height and alcohol consumption in the 2 cohorts using data from men who took part in both studies**

As explained in the paper, 156 men took part in both the Main and the Collaborative studies and to avoid duplication, the analyses in the paper used only the Collaborative study data. There was thus an opportunity to compare self-reported height from the Main study in 1965-1968 with recorded height from the Collaborative study in 1970-1973, and to investigate changes in reported alcohol consumption between the two studies.

The two measures of height were highly correlated,  $r=0.95$ ,  $p<0.0001$ . The self-reported height in the Main study was higher than the recorded height in the Collaborative study for these men ( $n=154$  as 2 had missing data). The mean heights in the Main and Collaborative studies were 170.36 and 168.45 cm respectively. The mean difference was 1.91 cm (95% confidence interval 1.56-2.26), paired t-test  $p<0.0001$ . Some shrinkage with ageing would be expected as the Collaborative study was conducted after the Main study.

The two measures of alcohol units/week were also highly correlated,  $r=0.73$ ,  $p<0.0001$ . The reported alcohol consumption generally increased between the 2 studies. The mean consumptions for the Main and Collaborative studies were 7.31 units and 11.74 units respectively, mean difference 4.43 (95% confidence interval 2.87 – 5.99), paired t-test  $p<0.0001$ . Taking account of the time between the two studies, there was a mean difference of 0.57 units per year, minimum -2.38, maximum 6.
